# Supplementary material
Source: Springer Nature journal article supplement (https://www.springermedizin.de/resource/supplementary/12874_2012_914_MOESM3_ESM.pdf/9433050)
Supplement: MOESM3 [file 9433050]

# Breast Cancer

## Cumulative Incidence Function

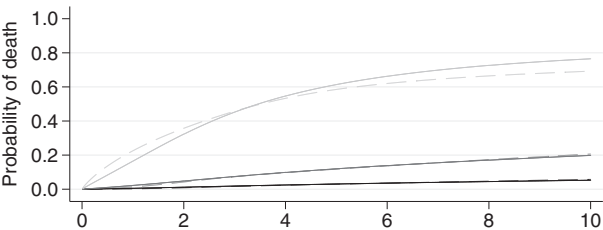

## Cause-Specific Hazard

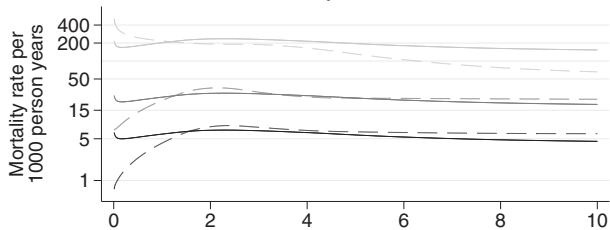

# Other Cancer

## Cumulative Incidence Function

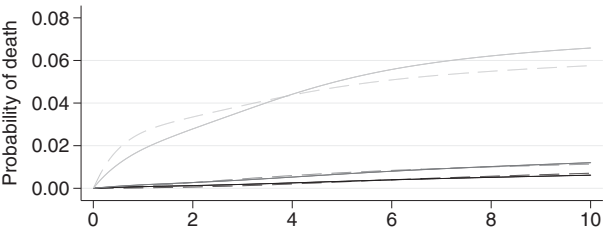

## Cause-Specific Hazard

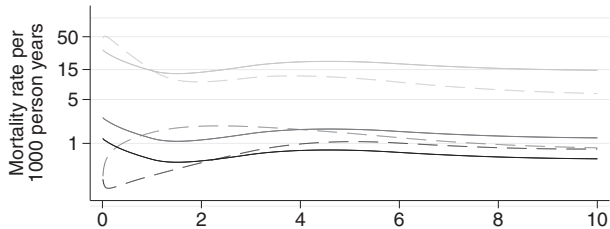

Time from diagnosis (years)

----- Localised (TD)

———— Localised (PH)

----- Regional (TD)

———— Regional (PH)

----- Distant (TD)

———— Distant (PH)
